# Supplementary material
Source: PubMed Central journal article supplement (PMC2430596)
Supplement: NIHMS53683-supplement-2.pdf [file NIHMS53683-supplement-2.pdf]

## Supplementary Online Content

Uhl GR, Liu Q-R, Drgon T, Johnson C, Walther D, Rose JE, David SP, Niaura R, Lerman C. Molecular genetics of successful smoking cessation: convergent genome-wide association study results. *Arch Gen Psychiatry*. 2008;65(6):683-693.

**Supplemental Text.** Analysis of DNA; Comments on Analytic Approaches

**eTable 1.** Study Subjects

**eTable 2.** Genes Harboring Allelic Variants That Distinguish Successful vs Unsuccessful Abstainers in at Least 2 Samples

**eTable 3.** Chromosomal Regions Not Annotated as Containing Genes With at Least 2 Clustered Nominally Positive SNPs

**eTable 4.** Results of Secondary Analyses That Identify Genes Based on Pooled Data From Placebo-, Bupropion-, and NRT-Treated Individuals From All 3 Samples

## ANALYSIS OF DNA

Hybridization probes were prepared from genomic DNA pools as described and hybridized to the commercial version (samples 1 and 3) or early access (sample 2) StyI or NspI 500K microarrays (Affymetrix, Santa Clara, California) that were washed, stained, and scanned as described.<sup>20</sup> Allele frequencies for each single-nucleotide polymorphism (SNP) in each DNA pool were assessed on the basis of hybridization to the “perfect-match” cells on each of 4 arrays from replicate experiments, as described.<sup>18,22</sup> A *t* statistic for the differences between successful and unsuccessful abstainers was obtained as described,<sup>18,21,22</sup> and nominally significant SNPs were defined as those for which *t* values correspond to  $P < .01$ . We deleted data from SNPs on sex chromosomes and SNPs for which chromosomal positions could not be adequately determined using Map Viewer Build 36.1 (National Center for Biotechnology Information, Bethesda, Maryland) or Netaffyx (Affymetrix).

The methods used herein have been found to generate correlations of 0.95 between pooled and individually determined genotype frequencies using these same array types.<sup>18,20,21,27-29</sup> When we have compared data for 7 randomly selected SNPs for which individual genotypes are available for 156 subjects from sample 1, we have identified strong correlations (with values up to 0.97) correlations between pool-to-pool variation noted in pooled and individually genotyped data (from Lerman et al<sup>16</sup>) for SNPs that display substantial pool-to-pool differences in allele frequency and more modest correlations for SNPs that display small pool-to-pool differences. In this additional validation study, the mean correlation between individually determined and pooled genotypes for this subsample was 0.74.

## COMMENTS ON ANALYTIC APPROACHES

Genome-wide association (GWA) gains power to detect variants in more and more of the genome as more and more genetic markers (SNPs) are assayed. Because so many SNPs were assayed in such studies, however, stringent approaches to correct for the large number of multiple comparisons are needed. There is no clear-cut consensus about a single method that will produce only true results from any single sample. We have approached this problem by identifying nominally significant SNPs in each sample, identifying the clustering of such SNPs in each sample, and seeking small genomic areas in which clusters from at least 2 of the replicate samples studied herein provide clustered nominally significant SNPs. The criterion used to identify clustering—0.1 megabase separation between SNPs—is similar to that used in previous studies of addiction vulnerability,<sup>18</sup> and thus allows more direct comparison between these data and previously reported data. Other approaches to defining clustering are possible, including methods that rely on linkage disequilibrium assessed in different samples. We have used Monte Carlo simulation methods that do not make assumptions about the underlying distribution of data and provide empirical *P* values based on repeated random samples of the actual data sets produced in these studies.

Bonferroni corrections for multiple comparisons are also advocated by some investigators. In addition, false discovery rate corrections can be applied when multiple *t* tests are generated, as we do herein. Permutation analyses provide additional approaches. When we have applied these alternative approaches to prior GWA datasets,<sup>18,19,21,22,30</sup> they have provided results that have not significantly enhanced those derived from Monte Carlo methods.

Monte Carlo methods gain special power when we seek to assess the significance of the reproducible results from convergent data from multiple independent data sets that differ from each other in number of pools, etc. Under these circumstances, none of the available alternative methods appears to provide as tractable a means of assessing the significance of results obtained in multiple samples without assumptions about underlying distributions of the data as do Monte Carlo approaches. Based on each of these considerations, we have focused on the Monte Carlo approach as a primary analytic strategy a priori, and have carried these planned analyses forward as documented herein. We have used 10 000 Monte Carlo trials in circumstances in which moderately

high significance is anticipated, and 100 000 trials in circumstances in which extremely high significance is anticipated, as noted in the text and tables.

**eTable 1. Study Subjects<sup>a</sup>**

| <b>Sample No.</b> | <b>No of Individuals</b> | <b>Abstinence Status</b> |                     | <b>No. of Individuals/ Pool</b> | <b>No. of Pools</b> | <b>No. of Array Sets</b> |
|-------------------|--------------------------|--------------------------|---------------------|---------------------------------|---------------------|--------------------------|
|                   |                          | <b>Successful</b>        | <b>Unsuccessful</b> |                                 |                     |                          |
| 1                 | 266                      | 126                      | 140                 | 14                              | 19                  | 76                       |
| 2                 | 134                      | 55                       | 79                  | 18-19                           | 7                   | 28                       |
| 3                 | 150                      | 60                       | 90                  | 15                              | 10                  | 40                       |

<sup>a</sup>We included 550 individuals in this report. Allele frequencies were assessed using 4 independent array sets for each pool.

**eTable 2. Genes Harboring Allelic Variants That Distinguish Successful vs Unsuccessful Abstainers in at Least 2 Samples<sup>a</sup>**

| Functional Class/<br>Gene Symbol | Description                                                      | Chr | Gene Start, bp | Gene End, bp | Strand <sup>b</sup> | Sample Nos. <sup>c</sup>  |   |   |    |   |   |             |   |   |    |   |   | P Value <sup>d</sup> | References to Other GWA Studies <sup>e</sup> |
|----------------------------------|------------------------------------------------------------------|-----|----------------|--------------|---------------------|---------------------------|---|---|----|---|---|-------------|---|---|----|---|---|----------------------|----------------------------------------------|
|                                  |                                                                  |     |                |              |                     | Clustered SNPs<br>P < .01 |   |   | 5' |   |   | Within Gene |   |   | 3' |   |   |                      |                                              |
|                                  |                                                                  |     |                |              |                     | 1                         | 2 | 3 | 1  | 2 | 3 | 1           | 2 | 3 | 1  | 2 | 3 |                      |                                              |
| Cell adhesion                    |                                                                  |     |                |              |                     |                           |   |   |    |   |   |             |   |   |    |   |   |                      |                                              |
| <i>DAB1</i>                      | Disabled homolog 1                                               | 1   | 57 236 167     | 58 488 799   | -                   | 7                         |   | 2 |    |   |   | 7           |   | 2 |    |   |   | .0117                |                                              |
| <i>ASTN</i>                      | Astrotactin                                                      | 1   | 175 096 826    | 175 400 647  | -                   |                           | 2 | 1 |    |   |   |             | 2 | 1 |    |   |   | .0334                |                                              |
| <i>USH2A</i>                     | Usher syndrome 2A                                                | 1   | 213 862 859    | 214 66 3361  | -                   |                           | 2 | 3 |    |   |   |             | 2 | 3 |    |   |   | .0421                |                                              |
| <i>CTNNA2</i>                    | catenin (cadherin-associated protein), $\alpha$ 2                | 2   | 79 593 634     | 80 729 416   | +                   |                           | 2 | 2 |    |   |   |             | 2 | 2 |    |   |   | .1254                |                                              |
| <i>CLSTN2</i>                    | Calsyntenin 2                                                    | 3   | 141 136 897    | 141 769 328  | +                   | 1                         | 4 | 3 |    |   |   |             | 3 | 3 | 1  | 1 |   | .0045                | 31                                           |
| <i>SEMA5A</i>                    | Semaphorin 5A                                                    | 5   | 9 091 850      | 9 599 158    | -                   | 5                         |   | 1 |    |   |   | 5           |   | 1 |    |   |   | .0087                |                                              |
| <i>TRIO</i>                      | Triple functional domain/TPRF interacting                        | 5   | 14 196 829     | 14 562 458   | +                   |                           | 2 | 2 |    |   |   |             | 2 | 2 |    |   |   | .0375                | 18                                           |
| <i>PTPRN2</i>                    | Receptor protein tyrosine phosphatase N polypeptide 2            | 7   | 157 024 516    | 158 073 179  | -                   | 5                         | 5 |   |    |   |   | 5           | 5 |   |    |   |   | .0056                |                                              |
| <i>CSMD1</i>                     | CUB and Sushi multiple domains 1                                 | 8   | 2 782 789      | 4 839 736    | -                   |                           | 1 | 5 |    |   |   |             | 1 | 5 |    |   |   | .0049                | 18                                           |
| <i>SGCZ</i>                      | Sarcoglycan zeta                                                 | 8   | 13 991 744     | 15 140 163   | -                   |                           | 3 | 5 |    |   |   |             | 3 | 5 |    |   |   | .0191                | 18                                           |
| <i>PTPRD</i>                     | Receptor protein tyrosine phosphatase D                          | 9   | 8 307 268      | 9 008 735    | -                   |                           | 2 | 8 |    |   |   |             | 2 | 8 |    |   |   | .0028                | 18                                           |
| <i>TEK</i>                       | TEK tyrosine kinase                                              | 9   | 27 099 286     | 27 220 172   | +                   | 2                         | 2 | 3 |    |   |   | 1           | 2 | 3 | 1  |   |   | .0011                |                                              |
| <i>PCDH15</i>                    | Protocadherin 15                                                 | 10  | 55 250 866     | 56 231 057   | -                   | 3                         |   | 4 |    |   |   | 3           |   | 4 |    |   |   | .0175                |                                              |
| <i>NRG3</i>                      | Neuregulin 3                                                     | 10  | 83 625 077     | 84 735 341   | +                   |                           | 4 | 1 |    |   |   |             | 4 | 1 |    |   |   | .0561                |                                              |
| <i>DSCAML1</i>                   | Down syndrome cell adhesion moleculelike 1                       | 11  | 116 803 699    | 117 173 186  | -                   |                           | 2 | 2 |    |   |   |             | 2 | 2 |    |   |   | .0365                |                                              |
| <i>NRXN3</i>                     | Neurexin 3                                                       | 14  | 77 939 846     | 79 400 515   | +                   |                           | 2 | 3 |    |   |   |             | 2 | 3 |    |   |   | .1002                | 21                                           |
| <i>ITGA11</i>                    | Integrin $\alpha$ 11                                             | 15  | 66 381 096     | 66 511 546   | -                   |                           | 2 | 1 |    |   |   |             | 2 | 1 |    |   |   | .0166                | 18                                           |
| <i>CDH13</i>                     | Cadherin 13                                                      | 16  | 81 218 079     | 82 387 702   | +                   | 8                         | 3 | 7 |    |   |   | 8           | 3 | 7 |    |   |   | .002                 |                                              |
| <i>LAMA1</i>                     | Laminin $\alpha$ 1                                               | 18  | 6 931 885      | 7 107 813    | -                   |                           | 2 | 2 |    |   |   |             | 2 | 2 |    |   |   | .0186                |                                              |
| <i>PTPRT</i>                     | Receptor protein tyrosine phosphatase T                          | 20  | 40 134 806     | 41 251 971   | -                   | 5                         | 6 | 5 |    |   |   | 5           | 6 | 5 |    |   |   | .0024                |                                              |
| <i>DSCAM</i>                     | Down syndrome cell adhesion molecule                             | 21  | 40 306 213     | 41 140 909   | -                   | 1                         | 2 |   |    |   |   | 1           | 2 |   |    |   |   | .0016                | 18                                           |
| Enzymes                          |                                                                  |     |                |              |                     |                           |   |   |    |   |   |             |   |   |    |   |   |                      |                                              |
| <i>ST6GALNAC3</i>                | $\alpha$ -N-acneuraminy1-2,3- $\beta$ -galactosyl 1,3)-N-acetyl- | 1   | 76 312 992     | 76 869 220   | +                   |                           | 2 | 4 |    |   |   |             | 2 | 4 |    |   |   | .0143                |                                              |

|                            |                                                            |    |             |             |   |   |   |   |  |   |   |   |   |   |  |   |   |   |       |    |
|----------------------------|------------------------------------------------------------|----|-------------|-------------|---|---|---|---|--|---|---|---|---|---|--|---|---|---|-------|----|
|                            | galactosaminide $\alpha$ 2, 6-sialyltransferase 3          |    |             |             |   |   |   |   |  |   |   |   |   |   |  |   |   |   |       |    |
| <i>REN</i>                 | Renin                                                      | 1  | 202 390 571 | 202 402 088 | - |   | 1 | 2 |  | 1 |   |   |   | 1 |  |   |   | 1 | .0067 |    |
| <i>CERKL</i>               | Ceramide kinase-like                                       | 2  | 182 109 650 | 182 229 996 | - |   | 1 | 3 |  |   |   |   | 1 | 3 |  |   |   |   | .0079 |    |
| <i>NEK11</i>               | NIMA-related kinase 11                                     | 3  | 132 228 417 | 132 551 993 | + | 7 |   | 7 |  |   |   | 7 |   | 6 |  |   |   | 1 | .0016 |    |
| <i>TNIK</i>                | TRAF2 and NCK interacting kinase                           | 3  | 172 264 364 | 172 660 546 | - |   | 2 | 2 |  |   |   |   | 2 | 2 |  |   |   |   | .0377 |    |
| <i>LEPREL1</i>             | Leprecan-like 1                                            | 3  | 191 157 316 | 191 321 412 | - |   | 4 | 2 |  |   |   |   | 4 | 2 |  |   |   |   | .006  |    |
| <i>GALNT17</i>             | Polypeptide N-acetylgalactosaminyl-transferase 17          | 4  | 172 971 229 | 174 199 285 | + |   | 4 | 2 |  |   |   |   | 4 | 2 |  |   |   |   | .058  |    |
| <i>ADCY2</i>               | Adenylate cyclase 2                                        | 5  | 7 449 345   | 7 883 194   | + | 3 |   | 1 |  |   |   | 3 |   |   |  |   |   | 1 | .0175 |    |
| <i>PPP2R2B</i>             | Protein phosphatase 2 regulatory subunit B $\beta$ isoform | 5  | 145 949 260 | 146 441 207 | - |   | 5 | 8 |  |   |   |   | 5 | 8 |  |   |   |   | .0007 |    |
| <i>DPP6</i>                | Dipeptidyl-peptidase 6                                     | 7  | 154 060 464 | 154 316 928 | + |   | 2 | 1 |  |   |   |   | 2 | 1 |  |   |   |   | .031  |    |
| <i>PBK</i>                 | PDZ-binding kinase                                         | 8  | 27 723 057  | 27 751 268  | - |   | 1 | 3 |  |   |   |   | 1 | 3 |  |   |   |   | .0038 |    |
| <i>ST3GAL1</i>             | ST3 $\beta$ -galactoside $\alpha$ -2,3-sialyltransferase 1 | 8  | 134 540 312 | 134 653 344 | - |   | 2 | 1 |  |   |   |   | 2 | 1 |  |   |   |   | .0158 |    |
| <i>MOBKL2B</i>             | MOB1-like 2B                                               | 9  | 27 315 207  | 27 519 850  | - | 1 | 2 |   |  |   |   | 1 | 2 |   |  |   |   |   | .0082 |    |
| <i>DAPK1</i>               | Death-associated protein kinase 1                          | 9  | 89 302 576  | 89 513 369  | + |   | 2 | 3 |  |   |   |   | 2 | 3 |  |   |   |   | .0105 |    |
| <i>LYZL1</i>               | Lysozymelike 1                                             | 10 | 29 617 996  | 29 640 164  | + |   | 2 | 2 |  | 1 |   |   | 2 |   |  |   |   | 1 | .0075 |    |
| <i>PRKG1</i>               | cGMP-dependent protein kinase 1                            | 10 | 52 504 299  | 53 725 284  | + | 7 | 3 | 4 |  | 1 | 7 | 3 | 3 |   |  |   |   |   | .0041 | 18 |
| <i>ADAM12</i>              | ADAM metallopeptidase domain 12                            | 10 | 127 693 415 | 128 067 055 | - |   | 1 | 2 |  |   |   |   | 1 | 2 |  |   |   |   | .0457 |    |
| <i>FDX1</i>                | Ferredoxin 1                                               | 11 | 109 805 804 | 109 840 815 | + |   | 2 | 1 |  | 1 |   |   | 1 |   |  |   |   | 1 | .01   |    |
| <i>SERPINA2</i>            | Serpin peptidase inhibitor A 2                             | 14 | 93 900 404  | 93 914 178  | - |   | 1 | 2 |  | 1 |   |   |   | 2 |  |   |   |   | .0078 | 18 |
| <i>SERPINA1</i>            | Serpin peptidase inhibitor A 1                             | 14 | 93 914 451  | 93 926 782  | - |   | 1 | 2 |  |   |   |   | 1 |   |  |   |   | 2 | .008  | 18 |
| <i>AKAP13</i>              | A kinase anchor protein 13                                 | 15 | 83 724 875  | 84 093 590  | + |   | 5 | 2 |  |   |   |   | 5 | 2 |  |   |   |   | .0065 | 18 |
| <i>ALDH3A2</i>             | Aldehyde dehydrogenase 3 A2                                | 17 | 19 492 656  | 19 521 500  | + | 1 | 1 |   |  | 1 |   |   |   |   |  | 1 |   |   | .0033 |    |
| <i>ATP9A</i>               | Adenosine triphosphatase II 9A                             | 20 | 49 646 721  | 49 818 315  | - | 1 | 1 | 2 |  |   | 1 | 1 |   | 1 |  |   | 1 |   | .0026 |    |
| <i>LARGE</i>               | Like-glycosyltransferase                                   | 22 | 31 999 063  | 32 646 410  | - |   | 4 | 4 |  |   | 1 |   | 4 | 3 |  |   |   |   | .0067 |    |
| Transcriptional regulation |                                                            |    |             |             |   |   |   |   |  |   |   |   |   |   |  |   |   |   |       |    |

|                 |                                                                  |    |             |             |   |   |   |   |   |   |   |   |   |   |  |  |   |       |    |
|-----------------|------------------------------------------------------------------|----|-------------|-------------|---|---|---|---|---|---|---|---|---|---|--|--|---|-------|----|
| <i>TDRD5</i>    | Tudor domain containing 5                                        | 1  | 177 827 648 | 177 927 021 | + | 2 |   | 1 |   |   | 1 | 2 |   |   |  |  |   | .0064 |    |
| <i>RARB</i>     | Retinoic acid receptor $\beta$                                   | 3  | 25 444 758  | 25 614 424  | + |   | 1 | 2 |   |   |   |   | 1 | 2 |  |  |   | .0218 |    |
| <i>SUPT3H</i>   | Suppressor of Ty 3 homolog                                       | 6  | 44 904 447  | 45 453 648  | - |   | 3 | 2 |   |   |   |   | 3 | 2 |  |  |   | .0306 |    |
| <i>CREB5</i>    | cAMP-responsive element binding protein 5                        | 7  | 28 305 465  | 28 832 036  | + | 5 |   | 2 |   |   |   | 5 |   | 2 |  |  |   | .0082 |    |
| <i>GLIS3</i>    | GLIS family zinc finger 3                                        | 9  | 3 817 676   | 4 142 183   | - |   | 3 | 2 |   |   |   |   | 3 | 2 |  |  |   | .0174 |    |
| <i>BNC2</i>     | Basonuclin 2                                                     | 9  | 16 399 501  | 16 860 786  | - |   | 3 | 6 |   |   |   |   | 3 | 6 |  |  |   | .0027 |    |
| <i>TACC2</i>    | Transforming acidic coiled-coil containing protein 2             | 10 | 123 738 679 | 124 004 047 | + | 1 | 1 |   |   |   |   | 1 | 1 |   |  |  |   | .0141 |    |
| <i>SOX5</i>     | SRY-box 5                                                        | 12 | 23 576 498  | 24 606 647  | - | 2 |   | 2 |   |   |   | 2 |   | 2 |  |  |   | .0514 |    |
| <i>NPAS3</i>    | Neuronal PAS domain protein 3                                    | 14 | 32 478 200  | 33 340 702  | + |   | 5 | 1 |   |   |   |   | 5 | 1 |  |  |   | .0239 | 18 |
| <i>PAX9</i>     | Paired box gene 9                                                | 14 | 36 200 656  | 36 215 621  | + | 1 |   | 2 | 1 |   | 2 |   |   |   |  |  |   | .0026 |    |
| <i>ZNF423</i>   | Zinc finger protein 423                                          | 16 | 48 082 022  | 48 418 419  | - | 3 | 3 |   |   |   |   | 3 |   |   |  |  | 3 | .0044 |    |
| <i>SALL4</i>    | Sal-like 4                                                       | 20 | 49 833 988  | 49 852 421  | - | 1 |   | 1 | 1 |   | 1 |   |   |   |  |  |   | .0039 |    |
| <i>ERG</i>      | v-ets Erythroblastosis virus E26 oncogene like                   | 21 | 38 675 671  | 38 955 488  | - |   | 2 | 2 |   |   |   |   | 2 | 1 |  |  | 1 | .0293 |    |
| <i>BCL2L13</i>  | Bcl2-like 13                                                     | 22 | 16 501 485  | 16 591 991  | + | 3 | 1 |   |   |   |   | 3 |   |   |  |  | 1 | .0037 |    |
| Receptors       |                                                                  |    |             |             |   |   |   |   |   |   |   |   |   |   |  |  |   |       |    |
| <i>GPR116</i>   | G protein-coupled receptor 116                                   | 6  | 46 928 294  | 46 990 825  | - |   | 2 | 1 |   |   |   |   | 2 | 1 |  |  |   | .0114 |    |
| <i>CD109</i>    | CD109 molecule                                                   | 6  | 74 462 548  | 74 591 509  | + | 1 |   | 1 |   |   |   | 1 |   | 1 |  |  |   | .0113 |    |
| <i>GRIK2</i>    | Inotropic glutamate receptor kainate 2                           | 6  | 101 953 675 | 102 623 474 | + |   | 2 | 2 |   |   |   |   | 2 | 2 |  |  |   | .0648 |    |
| <i>MTUS1</i>    | Mitochondrial tumor suppressor 1                                 | 8  | 17 545 583  | 17 702 666  | - |   | 3 | 3 |   |   |   |   | 3 | 3 |  |  |   | .0049 |    |
| <i>GRIN2A</i>   | Inotropic glutamate receptor N-methyl D-aspartate 2 <sup>a</sup> | 16 | 9 762 923   | 10 184 112  | - |   | 2 | 2 |   | 1 |   |   |   | 2 |  |  | 1 | .0427 |    |
| <i>GRIK1</i>    | Inotropic glutamate receptor kainate 1                           | 21 | 29 831 125  | 30 234 153  | - | 3 | 4 |   |   |   |   | 3 | 4 |   |  |  |   | .0028 |    |
| Channels        |                                                                  |    |             |             |   |   |   |   |   |   |   |   |   |   |  |  |   |       |    |
| <i>KCNN3</i>    | N-type potassium channel 3                                       | 1  | 152 946 526 | 153 109 378 | - |   | 1 | 2 |   |   |   |   | 1 | 2 |  |  |   | .0224 |    |
| <i>KCNK2</i>    | K-type potassium channel 2                                       | 1  | 213 245 765 | 213 477 059 | + |   | 4 | 2 |   |   |   |   | 1 | 2 |  |  | 3 | .0069 |    |
| <i>CACNA2D3</i> | Voltage-dependent calcium channel                                | 3  | 54 131 733  | 55 083 624  | + | 3 | 8 |   |   |   |   | 3 | 8 |   |  |  |   | .0031 |    |





|                     |                                                                      |    |             |             |   |   |   |   |   |   |   |   |   |   |   |   |   |  |       |
|---------------------|----------------------------------------------------------------------|----|-------------|-------------|---|---|---|---|---|---|---|---|---|---|---|---|---|--|-------|
|                     | protein 4                                                            |    |             |             |   |   |   |   |   |   |   |   |   |   |   |   |   |  |       |
| <i>NELLI</i>        | NEL-like 1                                                           | 11 | 20 647 712  | 21 553 577  | + |   | 2 | 2 |   |   |   |   | 2 | 2 |   |   |   |  | .0911 |
| <i>EFGBP2</i>       | EF-hand calcium-binding protein 2                                    | 16 | 82 559 738  | 82 593 880  | + | 1 |   | 1 |   |   |   |   |   | 1 | 1 |   |   |  | .0064 |
| <i>BIK</i>          | Bcl2-interacting killer                                              | 22 | 41 836 701  | 41 855 662  | + |   | 1 | 2 |   |   |   |   | 1 | 1 |   |   | 1 |  | .0087 |
| Structural proteins |                                                                      |    |             |             |   |   |   |   |   |   |   |   |   |   |   |   |   |  |       |
| <i>KIAA1026</i>     | Kazrin                                                               | 1  | 14 797 800  | 15 265 161  | + | 3 |   | 2 | 2 |   | 1 | 1 |   | 1 |   |   |   |  | .013  |
| <i>NPHS2</i>        | Podocin                                                              | 1  | 177 786 299 | 177 811 691 | - | 1 |   | 2 |   |   | 2 |   |   |   |   | 1 |   |  | .0038 |
| <i>PKP1</i>         | Plakophilin 1                                                        | 1  | 199 519 203 | 199 568 740 | + |   | 1 | 1 |   |   |   |   | 1 | 1 |   |   |   |  | .0153 |
| <i>ERC2</i>         | ELKS/RAB6-interacting/CAST family member 2                           | 3  | 55 517 376  | 56 477 431  | - |   | 5 | 3 |   |   |   |   | 5 | 3 |   |   |   |  | .0129 |
| <i>MAG11</i>        | Membrane-associated guanylate kinase, WW and PDZ domain containing 1 | 3  | 65 314 946  | 65 999 549  | - | 7 |   | 2 |   |   |   | 6 |   | 2 | 1 |   |   |  | .006  |
| <i>PARD3</i>        | Partitioning defective 3 homolog                                     | 10 | 34 440 103  | 35 143 929  | - | 4 | 2 | 2 |   |   |   | 4 | 2 | 2 |   |   |   |  | .0077 |
| <i>UNC13C</i>       | Unc13 homolog C                                                      | 15 | 52 092 393  | 52 708 098  | + |   | 3 | 2 |   |   |   |   | 3 | 2 |   |   |   |  | .0354 |
| <i>SNAP25</i>       | Synaptosomal-associated protein                                      | 20 | 10 147 477  | 10 236 065  | + |   | 1 | 3 |   |   |   |   | 1 | 3 |   |   |   |  | .0068 |
| <i>MYO18B</i>       | Myosin XVIIIIB                                                       | 22 | 24 468 120  | 24 757 007  | + |   | 5 | 3 |   |   |   |   | 5 | 3 |   |   |   |  | .0033 |
| Unknown function    |                                                                      |    |             |             |   |   |   |   |   |   |   |   |   |   |   |   |   |  |       |
| <i>TMEM108</i>      | Transmembrane protein 108                                            | 3  | 134 239 943 | 134 597 748 | + | 8 | 1 |   | 2 | 1 |   | 6 |   |   |   |   |   |  | .0009 |
| <i>C4orf22</i>      | Chromosome 4 open reading frame 22                                   | 4  | 81 475 898  | 82 103 928  | + |   | 1 | 1 |   | 1 |   |   |   | 1 |   |   |   |  | .0836 |
| <i>FLJ20184</i>     | Hypothetical protein FLJ20184                                        | 4  | 106 693 226 | 106 772 286 | + |   | 2 | 1 |   |   |   |   | 2 | 1 |   |   |   |  | .0139 |
| <i>C10orf64</i>     | Chromosome 10 open reading frame 64                                  | 10 | 49 563 518  | 49 686 269  | + | 1 |   | 2 |   |   |   | 1 |   | 2 |   |   |   |  | .0078 |
| <i>BTBD16</i>       | BTB domain containing 16                                             | 10 | 124 020 811 | 124 087 666 | + | 1 | 1 |   |   | 1 |   | 1 |   |   |   |   |   |  | .0059 |
| <i>LUZP2</i>        | Leucine zipper protein 2                                             | 11 | 24 475 132  | 25 060 762  | + | 3 | 1 |   |   |   |   | 3 | 1 |   |   |   |   |  | .0217 |
| <i>CCDC73</i>       | Coiled-coil domain containing 73                                     | 11 | 32 580 202  | 32 772 763  | - | 3 | 3 |   | 1 |   |   | 2 | 3 |   |   |   |   |  | .0031 |
| <i>FLJ42220</i>     | FLJ42220 protein                                                     | 14 | 36 186 635  | 36 187 505  | + | 2 |   | 2 |   |   |   |   |   |   | 2 |   | 2 |  | .003  |
| <i>CCBE1</i>        | Collagen- and calcium-binding EGF domains 1                          | 18 | 55 252 124  | 55 515 570  | - | 1 |   | 2 |   |   |   |   |   | 2 | 1 |   |   |  | .0134 |

Abbreviations: bp, base pair; cGMP, cyclic guanosine monophosphate; chr, chromosome; GWA, genome-wide association; SNP, single-nucleotide polymorphism; SRY, sex-determining region Y, -, negative; +, positive.

<sup>a</sup>Chromosome number and initial chromosomal position for the gene come from the National Center for Biotechnology Information Map Viewer Build 36.1. Monte Carlo *P* values come from 10 000 simulation trials that each begins with random sampling from a database that contains all gene segments  $\pm 10$  kilobases. These simulations assess the frequency of trials in which at least the observed numbers of nominally positive SNPs identified in each of the 3 samples studied herein was recorded to provide an empirical *P* value. Eight genes (noted in boldface) receive clustered, nominally highly significant association signals from each of the 3 samples studied herein. Other GWA studies with which the current results converge: (1) 639 000 SNP GWAs for dependence on at least 1 illegal substance in each of 2 samples with support from 100 000 SNP GWA for alcohol dependence and methamphetamine dependence<sup>18</sup>; (2) 10 000 SNP GWAs for dependence on at least 1 illegal substance in each of 2 samples<sup>21</sup>; and (3) 520 000 SNP GWAs for word recall memory.<sup>31</sup>

<sup>b</sup>Indicates chromosomal orientation of the gene (positive or negative strand).

<sup>c</sup>Indicates numbers of clustered SNPs from samples 1, 2, and 3, respectively, that display nominally highly significant ( $P < .01$ ) allele frequency differences between successful and unsuccessful abstainers in the 10-kilobase (kb) 5' flank of the gene, within the gene's exons or introns, or in the 10-kb 3' flank of annotated exons.

<sup>d</sup>Indicates *P* values for each gene based on Monte Carlo simulations and the reference for other GWA studies that have identified the same gene.

<sup>e</sup>Full references are found in the Reference List of the main article.

**eTable 3. Chromosomal Regions Not Annotated as Containing Genes With at Least 2 Clustered Nominally Positive SNPs<sup>a</sup>**

| Chr | Base Pair Start <sup>b</sup> | Base Pair Stop <sup>b</sup> | No. of SNPs, Sample No. <sup>c</sup> |    |    |
|-----|------------------------------|-----------------------------|--------------------------------------|----|----|
|     |                              |                             | 1                                    | 2  | 3  |
| 1   | 191 497 679                  | 194 451 536                 | 5                                    | 9  | 0  |
| 2   | 7 111 761                    | 8 729 564                   | 0                                    | 4  | 3  |
| 2   | 58 332 018                   | 60 521 806                  | 18                                   | 5  | 0  |
| 2   | 225 417 157                  | 227 298 182                 | 8                                    | 0  | 4  |
| 3   | 133 933 966                  | 134 229 943                 | 7                                    | 2  | 0  |
| 4   | 17 642 477                   | 19 854 333                  | 3                                    | 0  | 3  |
| 4   | 30 763 851                   | 35 734 017                  | 3                                    | 0  | 6  |
| 4   | 66 228 104                   | 68 010 584                  | 0                                    | 3  | 4  |
| 4   | 134 342 182                  | 138 650 285                 | 4                                    | 3  | 4  |
| 4   | 160 510 771                  | 162 514 499                 | 5                                    | 0  | 4  |
| 4   | 171 257 947                  | 172 961 229                 | 3                                    | 5  | 0  |
| 5   | 5 366 920                    | 6 415 039                   | 5                                    | 0  | 3  |
| 5   | 88 224 780                   | 89 715 284                  | 11                                   | 8  | 0  |
| 5   | 98 300 138                   | 99 889 023                  | 0                                    | 7  | 3  |
| 5   | 151 775 017                  | 152 840 499                 | 3                                    | 4  | 0  |
| 6   | 66 871 532                   | 69 394 158                  | 0                                    | 16 | 8  |
| 6   | 137 867 224                  | 138 220 274                 | 3                                    | 3  | 0  |
| 6   | 167 384 056                  | 167 446 247                 | 2                                    | 4  | 0  |
| 7   | 8 769 118                    | 9 630 425                   | 10                                   | 0  | 5  |
| 8   | 16 286 966                   | 16 884 705                  | 2                                    | 0  | 6  |
| 8   | 58 078 957                   | 59 059 667                  | 7                                    | 5  | 0  |
| 8   | 136 739 031                  | 139 214 285                 | 5                                    | 8  | 3  |
| 9   | 85 818 805                   | 86 072 912                  | 2                                    | 3  | 0  |
| 9   | 109 301 576                  | 110 646 692                 | 7                                    | 0  | 3  |
| 10  | 8 167 170                    | 11 077 290                  | 0                                    | 3  | 3  |
| 10  | 49 696 269                   | 49 777 534                  | 3                                    | 0  | 7  |
| 10  | 108 924 282                  | 111 604 514                 | 5                                    | 5  | 3  |
| 10  | 131 882 775                  | 132 770 645                 | 12                                   | 0  | 11 |
| 11  | 78 261 787                   | 82 110 694                  | 0                                    | 6  | 4  |
| 11  | 114 094 574                  | 114 540 227                 | 3                                    | 0  | 4  |
| 12  | 82 062 196                   | 83 767 398                  | 6                                    | 9  | 0  |
| 13  | 102 527 197                  | 104 906 593                 | 0                                    | 4  | 8  |
| 14  | 85 174 023                   | 87 459 111                  | 0                                    | 3  | 8  |
| 15  | 60 254 774                   | 60 706 663                  | 3                                    | 0  | 3  |
| 16  | 9 131 056                    | 9 752 923                   | 5                                    | 6  | 0  |
| 16  | 77 034 150                   | 78 175 732                  | 4                                    | 0  | 7  |
| 17  | 29 724 365                   | 29 921 881                  | 3                                    | 0  | 5  |
| 17  | 47 601 086                   | 49 245 261                  | 3                                    | 26 | 0  |
| 18  | 39 121 342                   | 40 525 467                  | 3                                    | 0  | 11 |
| 18  | 71 140 889                   | 72 188 625                  | 5                                    | 3  | 0  |
| 20  | 41 799 056                   | 41 968 221                  | 2                                    | 0  | 3  |

Abbreviations: chr, chromosome; SNP, single-nucleotide polymorphism.

<sup>a</sup>Indicates nominally positive SNPs (within 0.1 megabase of each other) from at least 2 of the 3 samples described herein.

<sup>b</sup>Indicates base pair location for the beginning and end of the interval marked by the clustered nominally positive SNPs.

<sup>‡</sup>Indicates the number of SNPs from samples 1, 2, and 3 that display nominal  $P < .01$  values for the differences between successful vs unsuccessful abstainers that lie within the interval.

**eTable 4. Results of Secondary Analyses That Identify Genes Based on Pooled Data From Placebo-, Bupropion-, and NRT-Treated Individuals From All 3 Samples<sup>a</sup>**

| Gene Symbol      | SNP <sup>b</sup> | Chr | Base Pair Location | t Value                     |                                   |                         |
|------------------|------------------|-----|--------------------|-----------------------------|-----------------------------------|-------------------------|
|                  |                  |     |                    | NRT vs Placebo <sup>c</sup> | Bupropion vs Placebo <sup>c</sup> | Difference <sup>d</sup> |
| NRT selective    |                  |     |                    |                             |                                   |                         |
| <i>ARL6IP2</i>   | rs12468478       | 2   | 38 421 058         | 4.784                       | 1.672                             | 3.112                   |
|                  | rs11883614       | 2   | 38 429 139         | 4.266                       | 2.486                             | 1.780                   |
|                  | rs4589732        | 2   | 38 467 481         | 4.034                       | 3.040                             | 0.995                   |
| <i>NRXN1</i>     | rs9677968        | 2   | 50 162 751         | 4.476                       | 1.009                             | 3.467                   |
|                  | rs921573         | 2   | 50 245 834         | 3.714                       | 1.591                             | 2.123                   |
|                  | rs11675607       | 2   | 50 277 378         | 3.910                       | 1.441                             | 2.469                   |
|                  | rs9309179        | 2   | 50 369 830         | 0.965                       | 3.831                             | -2.866                  |
| <i>HSPC159</i>   | rs10176971       | 2   | 64 530 626         | 4.150                       | 0.995                             | 3.155                   |
|                  | rs1426707        | 2   | 64 530 898         | 5.123                       | 0.393                             | 4.729                   |
| <i>CTNNA2</i>    | rs17019221       | 2   | 80 615 263         | 4.208                       | 0.601                             | 3.606                   |
|                  | rs1434064        | 2   | 80 710 572         | 4.134                       | 0.949                             | 3.184                   |
|                  | rs216645         | 2   | 80 737 369         | 3.899                       | 3.101                             | 0.798                   |
| <i>POLR1B</i>    | rs4849073        | 2   | 113 016 889        | 3.971                       | 3.094                             | 0.877                   |
|                  | rs4849074        | 2   | 113 017 468        | 3.737                       | 0.001                             | 3.736                   |
| <i>RAB17</i>     | rs7595979        | 2   | 238 146 492        | 5.195                       | 0.599                             | 4.596                   |
|                  | rs1497129        | 2   | 238 151 184        | 4.681                       | 2.933                             | 1.748                   |
|                  | rs6431541        | 2   | 238 158 190        | 3.707                       | 0.785                             | 2.922                   |
| <i>ARPP21</i>    | rs11129660       | 3   | 35 670 965         | 3.833                       | 1.432                             | 2.401                   |
|                  | rs9865772        | 3   | 35 769 904         | 5.745                       | 1.433                             | 4.312                   |
| <i>CACNA2D3</i>  | rs4955861        | 3   | 54 586 203         | 3.807                       | 3.360                             | 0.447                   |
|                  | rs4955866        | 3   | 54 586 793         | 4.836                       | 0.411                             | 4.425                   |
|                  | rs666071         | 3   | 54 684 761         | 5.979                       | 0.693                             | 5.286                   |
| <i>SYNPR</i>     | rs12374033       | 3   | 63 405 578         | 4.103                       | 0.964                             | 3.138                   |
|                  | rs17397636       | 3   | 63 476 495         | 4.554                       | 2.488                             | 2.067                   |
|                  | rs17338206       | 3   | 63 476 572         | 3.706                       | 2.453                             | 1.253                   |
|                  | rs17399554       | 3   | 63 542 394         | 2.037                       | 4.457                             | -2.420                  |
| <i>EPHB1</i>     | rs6762543        | 3   | 136 339 774        | 5.002                       | 0.610                             | 4.392                   |
|                  | rs10804635       | 3   | 136 361 774        | 4.100                       | 3.694                             | 0.406                   |
|                  | rs12636613       | 3   | 136 361 819        | 3.592                       | 3.640                             | -0.047                  |
| <i>CLSTN2</i>    | rs4683831        | 3   | 141 596 976        | 4.532                       | 0.411                             | 4.121                   |
|                  | rs6439919        | 3   | 141 648 020        | 4.091                       | 0.535                             | 3.556                   |
|                  | rs6810310        | 3   | 141 648 823        | 6.333                       | 1.448                             | 4.885                   |
| <i>TMPRSS11D</i> | rs13151552       | 4   | 68 360 369         | 4.318                       | 0.766                             | 3.552                   |
|                  | rs7671397        | 4   | 68 419 589         | 4.062                       | 0.899                             | 3.163                   |
| <i>GRID2</i>     | rs1435480        | 4   | 94 907 655         | 3.852                       | 0.321                             | 3.530                   |
|                  | rs11932367       | 4   | 94 914 733         | 3.837                       | 0.130                             | 3.707                   |
| <i>TRIM2</i>     | rs4696397        | 4   | 154 358 796        | 5.190                       | 1.167                             | 4.023                   |
|                  | rs17029639       | 4   | 154 368 893        | 4.493                       | 0.807                             | 3.686                   |
|                  | rs4696168        | 4   | 154 371 681        | 4.118                       | 0.238                             | 3.879                   |
| <i>SDCCAG10</i>  | rs2915438        | 5   | 64 347 813         | 3.918                       | 0.163                             | 3.755                   |
|                  | rs2915441        | 5   | 64 351 549         | 5.418                       | 0.166                             | 5.252                   |
| <i>KCNIP1</i>    | rs953601         | 5   | 169 997 291        | 5.586                       | 0.177                             | 5.409                   |
|                  | rs4867625        | 5   | 170 021 180        | 3.915                       | 0.308                             | 3.607                   |
|                  | rs872436         | 5   | 170 058 653        | 3.920                       | 1.632                             | 2.287                   |
|                  | rs984559         | 5   | 170 071 237        | 4.170                       | 1.313                             | 2.857                   |

|                  |            |            |             |       |       |        |
|------------------|------------|------------|-------------|-------|-------|--------|
|                  | rs1363713  | 5          | 170 095 672 | 5.213 | 1.642 | 3.571  |
| <i>FLJ37396</i>  | rs9374067  | 6          | 109 690 736 | 3.698 | 0.915 | 2.784  |
|                  | rs932222   | 6          | 109 693 371 | 4.903 | 2.026 | 2.877  |
| <i>ARHGAP18</i>  | rs1894642  | 6          | 130 057 024 | 4.342 | 1.181 | 3.160  |
|                  | rs763132   | 6          | 130 062 040 | 3.924 | 0.741 | 3.183  |
| <i>VIL2</i>      | rs6455600  | 6          | 159 117 280 | 3.977 | 0.388 | 3.588  |
|                  | rs6455601  | 6          | 159 137 292 | 5.881 | 1.891 | 3.990  |
| <i>DNAH11</i>    | rs4392794  | 7          | 21 702 815  | 7.131 | 0.691 | 6.440  |
|                  | rs12700327 | 7          | 21 729 025  | 3.691 | 0.761 | 2.929  |
|                  | rs1174962  | 7          | 21 817 682  | 4.580 | 2.373 | 2.206  |
| <i>TEK</i>       | rs7865623  | 9          | 27 142 209  | 2.949 | 3.942 | -0.993 |
|                  | rs7037246  | 9          | 27 219 544  | 4.270 | 0.488 | 3.782  |
|                  | rs857      | 9          | 27 219 786  | 3.762 | 0.346 | 3.416  |
| <i>PTGES</i>     | rs4474069  | 9          | 131 540 940 | 6.085 | 0.328 | 5.757  |
|                  | rs7035496  | 9          | 131 563 434 | 4.526 | 0.407 | 4.118  |
| <i>AKRIC4</i>    | rs3750571  | 10         | 5 237 434   | 5.092 | 1.345 | 3.747  |
|                  | rs4881413  | 10         | 5 248 450   | 4.136 | 0.189 | 3.947  |
| <i>ITIH5</i>     | rs12416004 | 10         | 7 650 219   | 4.065 | 1.366 | 2.699  |
|                  | rs11255241 | 10         | 7 700 496   | 3.929 | 0.364 | 3.565  |
|                  | rs11255242 | 10         | 7 701 120   | 3.912 | 0.055 | 3.857  |
| <i>CAMK1D</i>    | rs1644391  | 10         | 12 908 310  | 4.322 | 1.415 | 2.906  |
|                  | rs1757070  | 10         | 12 918 360  | 4.092 | 1.479 | 2.613  |
| <i>PARD3</i>     | rs1660622  | 10         | 34 496 515  | 4.955 | 0.077 | 4.878  |
|                  | rs629039   | 10         | 34 528 370  | 3.919 | 1.600 | 2.318  |
|                  | rs678188   | 10         | 34 535 295  | 4.264 | 0.168 | 4.096  |
|                  | rs1778871  | 10         | 34 575 027  | 5.635 | 0.084 | 5.551  |
|                  | rs1778870  | 10         | 34 615 285  | 5.075 | 1.109 | 3.966  |
|                  | rs16935302 | 10         | 34 629 748  | 3.971 | 0.276 | 3.695  |
| <i>PCDH15</i>    | rs10825324 | 10         | 55 840 119  | 3.789 | 1.854 | 1.935  |
|                  | rs12146398 | 10         | 55 842 860  | 4.352 | 0.643 | 3.709  |
|                  | rs11004281 | 10         | 55 843 065  | 3.902 | 0.967 | 2.935  |
| <i>C10orf107</i> | rs16916501 | 10         | 63 122 152  | 4.272 | 1.194 | 3.079  |
|                  | rs2448396  | 10         | 63 199 744  | 8.979 | 3.302 | 5.677  |
| <i>ADAM12</i>    | rs7920207  | 10         | 127 721 299 | 3.713 | 0.668 | 3.045  |
|                  | rs2292692  | 10         | 127 727 920 | 4.161 | 0.830 | 3.331  |
|                  | rs1710288  | 10         | 127 731 276 | 3.741 | 2.567 | 1.174  |
| <i>SPON1</i>     | rs7116230  | 11         | 13 992 156  | 3.997 | 0.390 | 3.607  |
|                  | rs11023051 | 11         | 13 992 537  | 4.279 | 2.374 | 1.905  |
|                  | rs11023054 | 11         | 14 005 230  | 3.582 | 3.859 | -0.277 |
|                  | rs10832165 | 11         | 14 005 260  | 5.154 | 3.991 | 1.164  |
|                  | rs11023055 | 11         | 14 005 745  | 6.811 | 2.741 | 4.070  |
|                  | rs11023059 | 11         | 14 020 968  | 4.108 | 1.401 | 2.707  |
|                  | rs1528640  | 11         | 14 027 404  | 4.659 | 1.719 | 2.940  |
|                  | rs11023067 | 11         | 14 031 836  | 4.029 | 1.253 | 2.775  |
| rs1406356        | 11         | 14 034 087 | 4.334       | 1.715 | 2.619 |        |
| <i>NELL1</i>     | rs10766758 | 11         | 20 970 702  | 4.001 | 0.671 | 3.330  |
|                  | rs1516757  | 11         | 21 037 853  | 6.197 | 2.648 | 3.549  |
|                  | rs1516748  | 11         | 21 046 745  | 5.359 | 2.744 | 2.615  |
|                  | rs1945413  | 11         | 21 418 450  | 3.822 | 0.070 | 3.753  |
|                  | rs6483772  | 11         | 21 459 570  | 4.311 | 3.028 | 1.283  |
|                  | rs4279993  | 11         | 21 483 019  | 1.444 | 3.926 | -2.482 |

|                 |            |    |             |       |       |        |
|-----------------|------------|----|-------------|-------|-------|--------|
| <i>STS-1</i>    | rs7930792  | 11 | 122 086 935 | 3.806 | 0.137 | 3.669  |
|                 | rs11218769 | 11 | 122 092 818 | 3.864 | 0.394 | 3.471  |
|                 | rs4936742  | 11 | 122 146 296 | 3.420 | 3.765 | -0.344 |
| <i>C12orf36</i> | rs4763340  | 12 | 13 421 760  | 4.820 | 2.408 | 2.411  |
|                 | rs1993508  | 12 | 13 423 598  | 4.470 | 1.218 | 3.252  |
| <i>NOS1</i>     | rs9658498  | 12 | 116 131 245 | 3.727 | 1.099 | 2.627  |
|                 | rs3741476  | 12 | 116 134 855 | 3.779 | 0.889 | 2.891  |
|                 | rs733334   | 12 | 116 195 409 | 4.943 | 1.400 | 3.543  |
|                 | rs17509231 | 12 | 116 257 043 | 3.950 | 2.840 | 1.110  |
| <i>CRYL1</i>    | rs17081647 | 13 | 19 875 507  | 3.696 | 0.049 | 3.646  |
|                 | rs9315607  | 13 | 19 939 654  | 3.896 | 2.703 | 1.193  |
| <i>TUBGCP3</i>  | rs7139689  | 13 | 112 259 301 | 3.997 | 0.266 | 3.730  |
|                 | rs9550153  | 13 | 112 282 279 | 4.233 | 0.704 | 3.529  |
|                 | rs9577820  | 13 | 112 296 262 | 6.210 | 2.687 | 3.524  |
| <i>ZNF597</i>   | rs171634   | 16 | 3 418 867   | 6.294 | 1.204 | 5.090  |
|                 | rs37824    | 16 | 3 426 237   | 5.303 | 1.919 | 3.384  |
| <i>XYLT1</i>    | rs9923657  | 16 | 17 121 806  | 4.660 | 1.508 | 3.152  |
|                 | rs9939115  | 16 | 17 128 060  | 3.759 | 0.364 | 3.396  |
|                 | rs9807009  | 16 | 17 133 351  | 4.181 | 1.786 | 2.395  |
|                 | rs4782031  | 16 | 17 141 541  | 4.684 | 0.285 | 4.399  |
| <i>CA10</i>     | rs981577   | 17 | 47 262 912  | 3.830 | 2.074 | 1.756  |
|                 | rs7215201  | 17 | 47 304 239  | 6.164 | 2.733 | 3.431  |
|                 | rs203018   | 17 | 47 390 503  | 3.851 | 2.378 | 1.472  |
| <i>LAMA3</i>    | rs11878083 | 18 | 19 691 466  | 6.432 | 0.579 | 5.854  |
|                 | rs8092476  | 18 | 19 692 630  | 6.176 | 0.362 | 5.814  |
|                 | rs8093042  | 18 | 19 695 482  | 4.083 | 0.755 | 3.328  |
|                 | rs8087837  | 18 | 19 731 580  | 5.206 | 0.193 | 5.013  |
|                 | rs1154238  | 18 | 19 769 389  | 5.449 | 0.391 | 5.058  |
|                 | rs1786045  | 18 | 19 791 960  | 4.520 | 0.272 | 4.249  |
| <i>CSF2RB</i>   | rs4821566  | 22 | 35 639 007  | 6.519 | 3.537 | 2.982  |
|                 | rs9607397  | 22 | 35 640 488  | 5.631 | 2.669 | 2.962  |
| Nonselective    |            |    |             |       |       |        |
| <i>NPHP4</i>    | rs4908559  | 1  | 5 878 404   | 3.199 | 3.752 | -0.553 |
|                 | rs2282281  | 1  | 5 882 943   | 2.546 | 6.496 | -3.950 |
|                 | rs3747987  | 1  | 5 900 385   | 2.624 | 4.241 | -1.616 |
|                 | rs4908639  | 1  | 5 972 849   | 5.879 | 2.324 | 3.555  |
| <i>KCTD3</i>    | rs4846828  | 1  | 213 818 026 | 4.641 | 3.832 | 0.809  |
|                 | rs2646806  | 1  | 213 868 035 | 2.301 | 3.746 | -1.445 |
| <i>USH2A</i>    | rs2646806  | 1  | 213 868 035 | 2.301 | 3.746 | -1.445 |
|                 | rs2646821  | 1  | 213 916 631 | 4.245 | 1.225 | 3.020  |
|                 | rs17046325 | 1  | 213 961 146 | 4.321 | 0.191 | 4.130  |
| <i>OBSCN</i>    | rs2144300  | 1  | 226 601 651 | 4.199 | 1.777 | 2.422  |
|                 | rs17315646 | 1  | 226 602 042 | 4.243 | 2.355 | 1.888  |
|                 | rs4846914  | 1  | 226 602 426 | 3.744 | 1.334 | 2.410  |
|                 | rs609526   | 1  | 226 615 641 | 4.603 | 2.836 | 1.767  |
| <i>GALNT2</i>   | rs4459095  | 1  | 228 292 315 | 3.896 | 1.204 | 2.692  |
|                 | rs872624   | 1  | 228 381 635 | 3.696 | 4.153 | -0.457 |
| <i>RNF144</i>   | rs4669112  | 2  | 6 979 250   | 0.298 | 3.791 | -3.493 |
|                 | rs771315   | 2  | 7 048 121   | 4.322 | 1.980 | 2.342  |
|                 | rs3772017  | 2  | 7 048 443   | 3.920 | 0.001 | 3.919  |
| <i>RBJ</i>      | rs6545814  | 2  | 25 042 967  | 2.592 | 3.729 | -1.138 |

|                 |            |   |             |       |       |        |
|-----------------|------------|---|-------------|-------|-------|--------|
|                 | rs2384061  | 2 | 25 047 271  | 5.058 | 5.099 | -0.042 |
| <i>REEP1</i>    | rs9917140  | 2 | 86 304 323  | 0.014 | 3.681 | -3.666 |
|                 | rs10175330 | 2 | 86 325 772  | 2.496 | 3.748 | -1.252 |
|                 | rs11691807 | 2 | 86 394 679  | 4.328 | 1.751 | 2.576  |
| <i>ALS2CR19</i> | rs2289025  | 2 | 205 794 726 | 0.864 | 5.499 | -4.635 |
|                 | rs1434160  | 2 | 205 813 311 | 0.822 | 3.725 | -2.903 |
|                 | rs6738364  | 2 | 205 849 770 | 3.922 | 0.218 | 3.704  |
|                 | rs7593566  | 2 | 205 921 326 | 3.737 | 2.157 | 1.580  |
| <i>ITGA9</i>    | rs6419832  | 3 | 37 593 101  | 5.141 | 3.874 | 1.267  |
|                 | rs2212035  | 3 | 37 599 249  | 4.273 | 4.668 | -0.395 |
|                 | rs9857453  | 3 | 37 600 754  | 4.433 | 3.612 | 0.821  |
|                 | rs1155741  | 3 | 37 602 116  | 3.796 | 2.264 | 1.532  |
|                 | rs6550486  | 3 | 37 603 958  | 4.789 | 4.393 | 0.395  |
| <i>FSTL1</i>    | rs4676776  | 3 | 121 589 229 | 2.348 | 6.686 | -4.338 |
|                 | rs1733329  | 3 | 121 589 510 | 4.419 | 2.104 | 2.315  |
|                 | rs4676698  | 3 | 121 589 903 | 2.916 | 3.766 | -0.850 |
|                 | rs1700     | 3 | 121 597 327 | 3.990 | 0.948 | 3.042  |
|                 | rs1147695  | 3 | 121 602 136 | 5.685 | 3.617 | 2.068  |
|                 | rs9880550  | 3 | 121 605 314 | 2.198 | 4.305 | -2.107 |
| <i>MIRN198</i>  | rs4676776  | 3 | 121 589 229 | 2.348 | 6.686 | -4.338 |
|                 | rs1733329  | 3 | 121 589 510 | 4.419 | 2.104 | 2.315  |
|                 | rs4676698  | 3 | 121 589 903 | 2.916 | 3.766 | -0.850 |
|                 | rs1700     | 3 | 121 597 327 | 3.990 | 0.948 | 3.042  |
|                 | rs1147695  | 3 | 121 602 136 | 5.685 | 3.617 | 2.068  |
|                 | rs9880550  | 3 | 121 605 314 | 2.198 | 4.305 | -2.107 |
| <i>TM4SF1</i>   | rs6440605  | 3 | 150 573 605 | 4.364 | 4.638 | -0.275 |
|                 | rs6808255  | 3 | 150 574 454 | 3.935 | 2.993 | 0.942  |
| <i>JAKMIP1</i>  | rs11940459 | 4 | 6 143 916   | 3.754 | 1.484 | 2.270  |
|                 | rs16838127 | 4 | 6 174 478   | 3.485 | 4.704 | -1.219 |
|                 | rs16838138 | 4 | 6 176 773   | 4.347 | 2.413 | 1.934  |
| <i>SYNPO2</i>   | rs10857061 | 4 | 120 138 941 | 0.150 | 5.660 | -5.510 |
|                 | rs13117019 | 4 | 120 169 338 | 3.827 | 2.370 | 1.457  |
|                 | rs10518319 | 4 | 120 169 800 | 7.450 | 4.540 | 2.910  |
| <i>SEMA5A</i>   | rs1024487  | 5 | 9 410 007   | 4.320 | 2.395 | 1.926  |
|                 | rs1205718  | 5 | 9 410 103   | 3.696 | 2.116 | 1.580  |
|                 | rs13174956 | 5 | 9 489 697   | 4.744 | 1.267 | 3.477  |
| <i>PLCXD3</i>   | rs6872806  | 5 | 41 371 807  | 5.104 | 1.133 | 3.971  |
|                 | rs7725517  | 5 | 41 391 870  | 4.091 | 3.206 | 0.886  |
|                 | rs16871303 | 5 | 41 412 396  | 4.233 | 4.872 | -0.639 |
|                 | rs9654393  | 5 | 41 449 453  | 3.701 | 1.126 | 2.575  |
| <i>FLJ46010</i> | rs39565    | 5 | 65 565 268  | 0.791 | 4.098 | -3.307 |
|                 | rs2997131  | 5 | 65 655 130  | 4.812 | 1.433 | 3.379  |
|                 | rs7708487  | 5 | 65 685 580  | 3.772 | 2.020 | 1.752  |
| <i>KCTD16</i>   | rs960963   | 5 | 143 683 708 | 4.067 | 1.356 | 2.711  |
|                 | rs244536   | 5 | 143 695 682 | 4.096 | 1.623 | 2.472  |
|                 | rs244525   | 5 | 143 708 284 | 4.596 | 0.477 | 4.119  |
|                 | rs1023679  | 5 | 143 746 359 | 4.015 | 1.360 | 2.655  |
|                 | rs145716   | 5 | 143 827 411 | 3.754 | 1.486 | 2.268  |
| <i>GRIA1</i>    | rs10070447 | 5 | 153 159 007 | 0.968 | 5.169 | -4.201 |
|                 | rs13354399 | 5 | 153 169 624 | 3.135 | 3.664 | -0.529 |
| <i>C6orf170</i> | rs1273745  | 6 | 121 506 710 | 4.453 | 1.026 | 3.426  |



|                 |            |    |             |       |       |        |
|-----------------|------------|----|-------------|-------|-------|--------|
|                 | rs1273746  | 6  | 121 506 916 | 4.001 | 2.788 | 1.213  |
|                 | rs12717175 | 6  | 121 576 730 | 4.105 | 1.935 | 2.170  |
|                 | rs463      | 7  | 43 076 024  | 4.271 | 0.353 | 3.919  |
| <i>AUTS2</i>    | rs7793102  | 7  | 69 593 327  | 4.710 | 0.237 | 4.472  |
|                 | rs10265371 | 7  | 69 633 026  | 0.118 | 3.685 | -3.567 |
|                 | rs4718991  | 7  | 69 650 784  | 2.529 | 3.962 | -1.433 |
|                 | rs6957385  | 7  | 69 661 080  | 6.560 | 1.491 | 5.069  |
| <i>TRIM24</i>   | rs3778705  | 7  | 137 720 145 | 4.343 | 0.782 | 3.561  |
|                 | rs6956225  | 7  | 137 792 501 | 2.964 | 4.963 | -1.999 |
| <i>DENND1A</i>  | rs7023669  | 9  | 125 284 313 | 1.961 | 5.022 | -3.061 |
|                 | rs1891034  | 9  | 125 311 953 | 4.592 | 1.348 | 3.244  |
|                 | rs522894   | 9  | 125 379 159 | 4.077 | 1.496 | 2.581  |
| <i>SFMBT2</i>   | rs2462696  | 10 | 7 248 868   | 1.715 | 3.730 | -2.014 |
|                 | rs2762608  | 10 | 7 269 445   | 1.541 | 3.582 | -2.042 |
|                 | rs2692840  | 10 | 7 299 452   | 4.787 | 0.328 | 4.459  |
| <i>CUGBP2</i>   | rs7907550  | 10 | 11 171 558  | 0.104 | 4.050 | -3.946 |
|                 | rs636416   | 10 | 11 259 496  | 4.023 | 0.867 | 3.157  |
|                 | rs658469   | 10 | 11 261 372  | 2.222 | 3.723 | -1.500 |
|                 | rs1058349  | 10 | 11 342 383  | 4.635 | 1.607 | 3.028  |
|                 | rs10795859 | 10 | 11 385 712  | 5.872 | 3.367 | 2.505  |
| <i>MYPN</i>     | rs1906719  | 10 | 69 584 587  | 4.145 | 3.364 | 0.781  |
|                 | rs7079385  | 10 | 69 628 981  | 3.971 | 2.833 | 1.138  |
|                 | rs10998021 | 10 | 69 638 195  | 4.743 | 3.374 | 1.369  |
| <i>PNLIPRP3</i> | rs17094718 | 10 | 118 175 653 | 3.871 | 0.193 | 3.679  |
|                 | rs1897511  | 10 | 118 176 259 | 1.066 | 4.204 | -3.138 |
| <i>TXNL2</i>    | rs4750788  | 10 | 131 815 840 | 0.366 | 4.489 | -4.123 |
|                 | rs16910144 | 10 | 131 838 548 | 3.796 | 2.826 | 0.970  |
| <i>FLJ46154</i> | rs288464   | 11 | 31 019 531  | 4.069 | 2.326 | 1.743  |
|                 | rs208064   | 11 | 31 114 971  | 0.472 | 5.145 | -4.673 |
| <i>SLC1A2</i>   | rs4756208  | 11 | 35 276 660  | 5.195 | 2.748 | 2.447  |
|                 | rs10836389 | 11 | 35 372 547  | 1.393 | 3.594 | -2.201 |
| <i>FDX1</i>     | rs4753891  | 11 | 109 803 757 | 4.464 | 1.984 | 2.480  |
|                 | rs935135   | 11 | 109 835 105 | 3.836 | 1.050 | 2.786  |
| <i>IGSF4</i>    | rs1124848  | 11 | 114 591 158 | 4.994 | 3.820 | 1.174  |
|                 | rs11215464 | 11 | 114 661 446 | 4.401 | 3.489 | 0.913  |
|                 | rs10891823 | 11 | 114 663 444 | 6.506 | 1.462 | 5.044  |
| <i>HNT</i>      | rs11222888 | 11 | 131 426 061 | 1.308 | 4.751 | -3.443 |
|                 | rs9667087  | 11 | 131 489 352 | 4.411 | 0.493 | 3.918  |
|                 | rs10894503 | 11 | 131 489 763 | 3.792 | 1.559 | 2.233  |
|                 | rs10791209 | 11 | 131 513 590 | 3.717 | 1.105 | 2.612  |
| <i>EFCAB4B</i>  | rs10848906 | 12 | 3 638 966   | 4.737 | 4.076 | 0.661  |
|                 | rs242028   | 12 | 3 656 976   | 0.860 | 5.014 | -4.153 |
|                 | rs4766163  | 12 | 3 690 519   | 3.979 | 0.399 | 3.580  |
| <i>GRIN2B</i>   | rs9971835  | 12 | 13 953 134  | 1.094 | 3.637 | -2.543 |
|                 | rs10772719 | 12 | 13 959 964  | 4.523 | 2.270 | 2.253  |
|                 | rs219920   | 12 | 13 992 578  | 3.794 | 2.233 | 1.561  |
| <i>PLEKHA5</i>  | rs1514831  | 12 | 19 195 039  | 3.871 | 1.751 | 2.120  |
|                 | rs10841162 | 12 | 19 208 349  | 4.370 | 1.810 | 2.560  |
|                 | rs16915248 | 12 | 19 275 480  | 4.227 | 1.075 | 3.152  |
| <i>ITPR2</i>    | rs11048476 | 12 | 26 393 579  | 4.377 | 1.523 | 2.853  |
|                 | rs2171520  | 12 | 26 395 604  | 4.568 | 0.014 | 4.554  |

|          |            |    |             |       |       |        |
|----------|------------|----|-------------|-------|-------|--------|
|          | rs1532067  | 12 | 26 493 700  | 4.583 | 2.041 | 2.542  |
| YAF2     | rs12371615 | 12 | 40 850 256  | 4.059 | 1.492 | 2.568  |
|          | rs10880264 | 12 | 40 872 802  | 4.385 | 2.994 | 1.391  |
|          | rs10785334 | 12 | 40 906 644  | 4.152 | 0.322 | 3.830  |
| BTBD11   | rs4964569  | 12 | 106 253 978 | 1.425 | 4.195 | -2.770 |
|          | rs1426467  | 12 | 106 274 715 | 4.188 | 1.277 | 2.911  |
|          | rs7957618  | 12 | 106 332 823 | 3.764 | 1.406 | 2.358  |
|          | rs10778561 | 12 | 106 364 091 | 0.483 | 4.720 | -4.238 |
| OAS2     | rs2525846  | 12 | 111 916 273 | 4.091 | 2.530 | 1.561  |
|          | rs1732778  | 12 | 111 919 645 | 4.987 | 2.520 | 2.467  |
|          | rs1293778  | 12 | 111 929 847 | 5.343 | 3.340 | 2.004  |
| NPAS3    | rs17101083 | 14 | 32 965 666  | 2.768 | 4.013 | -1.245 |
|          | rs967440   | 14 | 32 977 498  | 3.962 | 2.184 | 1.778  |
|          | rs12887949 | 14 | 33 048 257  | 4.631 | 3.865 | 0.767  |
| RGS6     | rs2332712  | 14 | 71 607 946  | 2.458 | 4.929 | -2.471 |
|          | rs17108294 | 14 | 71 693 707  | 3.774 | 4.481 | -0.706 |
|          | rs20838    | 14 | 71 714 279  | 1.098 | 3.642 | -2.544 |
|          | rs1076317  | 14 | 71 802 071  | 5.979 | 1.989 | 3.989  |
|          | rs1568404  | 14 | 71 806 722  | 4.292 | 2.615 | 1.677  |
|          | rs12184980 | 14 | 71 815 012  | 3.896 | 1.795 | 2.101  |
| DPF3     | rs758913   | 14 | 72 334 214  | 2.896 | 4.010 | -1.114 |
|          | rs4243643  | 14 | 72 364 297  | 4.368 | 1.596 | 2.772  |
|          | rs2333006  | 14 | 72 427 007  | 3.732 | 2.449 | 1.282  |
| MYO1E    | rs17190785 | 15 | 57 243 929  | 4.969 | 0.388 | 4.581  |
|          | rs2242321  | 15 | 57 253 509  | 1.444 | 3.755 | -2.311 |
|          | rs11854052 | 15 | 57 254 345  | 5.345 | 0.610 | 4.735  |
| A2BP1    | rs17139303 | 16 | 6 055 552   | 1.882 | 3.982 | -2.101 |
|          | rs2035593  | 16 | 6 101 996   | 3.779 | 0.580 | 3.199  |
|          | rs9646295  | 16 | 6 110 094   | 3.989 | 1.862 | 2.126  |
| TNRC6A   | rs16973968 | 16 | 24 664 039  | 2.149 | 3.709 | -1.561 |
|          | rs12596320 | 16 | 24 725 006  | 5.856 | 0.660 | 5.196  |
| CDH13    | rs7187677  | 16 | 81 674 862  | 3.785 | 0.465 | 3.320  |
|          | rs13339002 | 16 | 81 738 358  | 1.125 | 3.874 | -2.749 |
|          | rs889730   | 16 | 81 814 806  | 4.170 | 0.643 | 3.527  |
|          | rs4782805  | 16 | 82 095 671  | 2.143 | 3.787 | -1.644 |
|          | rs4074373  | 16 | 82 113 026  | 0.752 | 4.070 | -3.318 |
|          | rs4782814  | 16 | 82 127 288  | 4.220 | 0.993 | 3.227  |
| WFDC1    | rs39547    | 16 | 82 877 290  | 1.907 | 3.800 | -1.893 |
|          | rs8051764  | 16 | 82 898 397  | 3.389 | 3.785 | -0.397 |
| GLP2R    | rs2047664  | 17 | 9 669 336   | 3.758 | 0.132 | 3.626  |
|          | rs4791901  | 17 | 9 722 679   | 3.832 | 1.306 | 2.526  |
|          | rs2240737  | 17 | 9 731 884   | 3.692 | 1.685 | 2.007  |
| GAS7     | rs16959082 | 17 | 9 801 736   | 3.907 | 1.038 | 2.869  |
|          | rs16959192 | 17 | 9 830 867   | 4.247 | 0.768 | 3.478  |
| SCAP1    | rs12948653 | 17 | 43 614 253  | 3.850 | 0.537 | 3.314  |
|          | rs10514935 | 17 | 43 615 673  | 3.819 | 3.821 | -0.002 |
|          | rs9905961  | 17 | 43 711 363  | 4.335 | 3.317 | 1.019  |
| GP6      | rs11668169 | 19 | 60 227 294  | 3.852 | 1.318 | 2.533  |
|          | rs1671214  | 19 | 60 244 635  | 4.721 | 1.028 | 3.693  |
| C20orf85 | rs6513369  | 20 | 56 168 677  | 3.466 | 4.087 | -0.621 |
|          | rs884341   | 20 | 56 170 080  | 2.983 | 4.114 | -1.131 |

|                     |            |    |             |       |       |        |
|---------------------|------------|----|-------------|-------|-------|--------|
|                     | rs6015215  | 20 | 56 178 326  | 0.083 | 5.618 | -5.535 |
| <i>FBXO7</i>        | rs5754110  | 22 | 31 202 798  | 1.199 | 4.045 | -2.846 |
|                     | rs2267179  | 22 | 31 210 334  | 4.207 | 1.015 | 3.192  |
|                     | rs738981   | 22 | 31 211 339  | 4.727 | 0.420 | 4.307  |
| <i>LARGE</i>        | rs2267293  | 22 | 32 536 110  | 3.856 | 1.429 | 2.427  |
|                     | rs1894428  | 22 | 32 550 739  | 3.804 | 2.137 | 1.667  |
|                     | rs1894429  | 22 | 32 550 994  | 5.594 | 1.918 | 3.675  |
| Bupropion selective |            |    |             |       |       |        |
| <i>CACNA1E</i>      | rs3935384  | 1  | 179 760 627 | 1.044 | 3.589 | -2.545 |
|                     | rs12091137 | 1  | 179 807 389 | 1.201 | 4.322 | -3.121 |
|                     | rs12086466 | 1  | 179 807 435 | 1.865 | 4.237 | -2.372 |
|                     | rs723015   | 1  | 179 808 238 | 4.159 | 2.780 | 1.380  |
|                     | rs10797838 | 1  | 179 808 677 | 1.424 | 3.995 | -2.570 |
|                     | rs10797839 | 1  | 179 809 454 | 1.304 | 4.688 | -3.384 |
|                     | rs10752898 | 1  | 179 809 553 | 1.349 | 4.015 | -2.666 |
|                     | rs2027085  | 1  | 179 840 268 | 1.566 | 4.141 | -2.575 |
| <i>NAG</i>          | rs2049718  | 2  | 15 469 187  | 1.877 | 3.781 | -1.904 |
|                     | rs2031011  | 2  | 15 498 988  | 0.027 | 3.865 | -3.838 |
|                     | rs7568678  | 2  | 15 546 801  | 3.856 | 1.006 | 2.850  |
|                     | rs2241237  | 2  | 15 606 755  | 3.998 | 3.414 | 0.584  |
|                     | rs6710456  | 2  | 15 620 537  | 1.751 | 4.164 | -2.412 |
|                     | rs11694485 | 2  | 15 626 752  | 2.252 | 5.297 | -3.045 |
| <i>GALNT13</i>      | rs10931861 | 2  | 154 650 478 | 2.824 | 3.950 | -1.125 |
|                     | rs12693888 | 2  | 154 668 170 | 2.445 | 3.953 | -1.509 |
|                     | rs1013694  | 2  | 154 686 856 | 3.003 | 3.838 | -0.836 |
|                     | rs7608978  | 2  | 154 715 317 | 0.068 | 5.751 | -5.683 |
| <i>PLCLI</i>        | rs1607373  | 2  | 198 626 038 | 1.771 | 4.354 | -2.583 |
|                     | rs1518360  | 2  | 198 640 809 | 2.437 | 4.515 | -2.078 |
|                     | rs10177758 | 2  | 198 684 423 | 2.001 | 3.640 | -1.640 |
|                     | rs1371664  | 2  | 198 729 971 | 4.978 | 3.165 | 1.813  |
| <i>GALNT17</i>      | rs336006   | 4  | 173 735 675 | 0.300 | 4.024 | -3.724 |
|                     | rs10004745 | 4  | 173 769 727 | 0.797 | 3.710 | -2.913 |
|                     | rs1455126  | 4  | 173 842 252 | 1.330 | 3.994 | -2.663 |
| <i>SILI</i>         | rs7731574  | 5  | 138 482 091 | 0.658 | 4.368 | -3.710 |
|                     | rs13160445 | 5  | 138 545 134 | 1.567 | 3.672 | -2.105 |
| <i>SDK1</i>         | rs12672248 | 7  | 3 333 145   | 1.936 | 4.888 | -2.952 |
|                     | rs10085602 | 7  | 3 406 258   | 2.864 | 6.486 | -3.622 |
|                     | rs2341447  | 7  | 3 476 429   | 0.642 | 3.628 | -2.986 |
| <i>GPR37</i>        | rs12540261 | 7  | 124 180 788 | 0.294 | 3.583 | -3.289 |
|                     | rs12535807 | 7  | 124 185 384 | 0.020 | 3.684 | -3.664 |
| <i>POT1</i>         | rs7806530  | 7  | 124 253 835 | 2.179 | 3.982 | -1.803 |
|                     | rs10269342 | 7  | 124 287 796 | 1.751 | 4.123 | -2.372 |
| <i>C9orf47</i>      | rs10991722 | 9  | 90 797 821  | 1.242 | 5.038 | -3.796 |
|                     | rs10820820 | 9  | 90 810 753  | 0.230 | 7.271 | -7.041 |
| <i>EDG3</i>         | rs10991722 | 9  | 90 797 821  | 1.242 | 5.038 | -3.796 |
|                     | rs10820820 | 9  | 90 810 753  | 0.230 | 7.271 | -7.041 |
| <i>SUFU</i>         | rs4919652  | 10 | 104 264 147 | 3.885 | 0.414 | 3.472  |
|                     | rs10786684 | 10 | 104 313 018 | 0.436 | 4.572 | -4.136 |
|                     | rs10786685 | 10 | 104 313 093 | 0.218 | 4.554 | -4.336 |
|                     | rs4917976  | 10 | 104 350 508 | 0.300 | 3.814 | -3.514 |

|                 |            |    |             |       |       |        |
|-----------------|------------|----|-------------|-------|-------|--------|
|                 | rs7075269  | 10 | 104 355 714 | 1.462 | 4.040 | -2.578 |
|                 | rs7907417  | 10 | 104 360 652 | 0.218 | 3.892 | -3.674 |
| <i>BRWD2</i>    | rs10788126 | 10 | 122 647 189 | 0.322 | 6.938 | -6.615 |
|                 | rs6585674  | 10 | 122 648 007 | 0.346 | 4.593 | -4.247 |
|                 | rs1530116  | 10 | 122 657 012 | 0.167 | 3.960 | -3.793 |
| <i>TUB</i>      | rs4758287  | 11 | 8 056 489   | 1.045 | 4.309 | -3.264 |
|                 | rs11041740 | 11 | 8 074 094   | 0.118 | 4.705 | -4.587 |
|                 | rs1055233  | 11 | 8 084 071   | 0.208 | 4.100 | -3.892 |
|                 | rs4343012  | 11 | 8 089 751   | 1.284 | 4.875 | -3.591 |
|                 | rs10734629 | 11 | 8 143 253   | 2.098 | 5.753 | -3.654 |
| <i>RIC3</i>     | rs1055233  | 11 | 8 084 071   | 0.208 | 4.100 | -3.892 |
|                 | rs4343012  | 11 | 8 089 751   | 1.284 | 4.875 | -3.591 |
|                 | rs10839984 | 11 | 8 137 470   | 1.203 | 4.538 | -3.336 |
| <i>NCAM1</i>    | rs6589354  | 11 | 112 383 757 | 1.983 | 3.853 | -1.870 |
|                 | rs12794745 | 11 | 112 456 919 | 2.520 | 4.552 | -2.032 |
|                 | rs11214501 | 11 | 112 490 687 | 0.209 | 4.292 | -4.083 |
|                 | rs4937993  | 11 | 112 509 872 | 0.300 | 3.911 | -3.611 |
|                 | rs10891510 | 11 | 112 513 370 | 2.199 | 4.366 | -2.167 |
| <i>OR8F1P</i>   | rs4935872  | 11 | 123 581 205 | 2.018 | 3.730 | -1.712 |
|                 | rs4936911  | 11 | 123 581 430 | 2.754 | 4.861 | -2.108 |
|                 | rs10893162 | 11 | 123 581 479 | 1.518 | 6.045 | -4.527 |
|                 | rs10893168 | 11 | 123 584 949 | 1.727 | 4.214 | -2.487 |
|                 | rs2512284  | 11 | 123 591 632 | 4.030 | 2.751 | 1.279  |
| <i>OR8G3P</i>   | rs4935872  | 11 | 123 581 205 | 2.018 | 3.730 | -1.712 |
|                 | rs4936911  | 11 | 123 581 430 | 2.754 | 4.861 | -2.108 |
|                 | rs10893162 | 11 | 123 581 479 | 1.518 | 6.045 | -4.527 |
|                 | rs10893168 | 11 | 123 584 949 | 1.727 | 4.214 | -2.487 |
|                 | rs2512284  | 11 | 123 591 632 | 4.030 | 2.751 | 1.279  |
| <i>OR8D1</i>    | rs10893205 | 11 | 123 677 775 | 2.606 | 5.512 | -2.906 |
|                 | rs10893206 | 11 | 123 680 084 | 1.069 | 3.704 | -2.634 |
|                 | rs7107539  | 11 | 123 685 492 | 2.121 | 3.629 | -1.508 |
|                 | rs7107539  | 11 | 123 685 492 | 2.121 | 3.629 | -1.508 |
| <i>OAS1</i>     | rs4766674  | 12 | 111 827 921 | 3.054 | 6.153 | -3.098 |
|                 | rs10774679 | 12 | 111 837 468 | 2.179 | 3.925 | -1.746 |
| <i>POSTN</i>    | rs7995907  | 13 | 37 033 780  | 1.297 | 4.473 | -3.177 |
|                 | rs9576309  | 13 | 37 059 563  | 1.000 | 4.275 | -3.275 |
| <i>VGCNL1</i>   | rs11069434 | 13 | 100 681 085 | 1.042 | 3.676 | -2.635 |
|                 | rs1333758  | 13 | 100 695 884 | 2.781 | 5.693 | -2.912 |
|                 | rs509933   | 13 | 100 768 557 | 3.133 | 4.536 | -1.403 |
| <i>KIAA0672</i> | rs7223372  | 17 | 12 713 626  | 1.548 | 4.808 | -3.260 |
|                 | rs7209847  | 17 | 12 745 275  | 1.926 | 4.274 | -2.348 |
|                 | rs6502214  | 17 | 12 749 964  | 3.720 | 2.413 | 1.306  |
| <i>DOK6</i>     | rs10084092 | 18 | 65 430 704  | 1.232 | 4.870 | -3.638 |
|                 | rs10871647 | 18 | 65 466 878  | 1.992 | 4.060 | -2.068 |
|                 | rs4243315  | 18 | 65 484 826  | 2.386 | 4.238 | -1.852 |
| <i>PEPD</i>     | rs1477336  | 19 | 38 638 733  | 4.466 | 3.459 | 1.007  |
|                 | rs17761012 | 19 | 38 642 117  | 1.600 | 3.877 | -2.277 |
|                 | rs3786922  | 19 | 38 698 220  | 2.443 | 4.525 | -2.082 |
| <i>CYP2A7P1</i> | rs10419393 | 19 | 46 096 036  | 2.804 | 3.745 | -0.941 |
|                 | rs3844443  | 19 | 46 123 775  | 1.149 | 4.630 | -3.481 |
|                 | rs7251950  | 19 | 46 174 582  | 1.139 | 4.052 | -2.914 |

Abbreviations: chr, chromosome; NRT, nicotine replacement therapy; SNP, single-nucleotide polymorphism.

<sup>a</sup>We determined SNPs that displayed  $t$  values corresponding to  $P < .005$  for the differences in successful abstinence for NRT vs placebo treatment ( $t > 3.69$ ), bupropion hydrochloride vs placebo treatment ( $t > 3.58$ ), or both. Genes identified by at least 2 such SNPs were identified as noted in the “Methods” section of the text, and those for which most SNPs were NRT, those for which most SNPs were bupropion specific, and those for which there was no clear treatment specificity are listed. The SNPs listed in this table as identifying the genes listed herein cluster within small chromosomal regions to extents much greater than that expected by chance (Monte Carlo  $P < .00001$ ).

<sup>b</sup>Indicates clustered SNPs that identify the genes.

<sup>c</sup>Indicates the differences in allelic frequencies between the active therapy vs placebo.

<sup>d</sup>Indicates the difference between the  $t$  values in the 2 preceding columns.
